# Supplementary material for: Density distribution of gene expression profiles and evaluation of using maximal information coefficient to identify differentially expressed genes
Source: PubMed Central journal article supplement (PMC6636747; doi:10.1371/journal.pone.0219551), 2019-07-17
Supplement: pone.0219551.s122.pdf [file pone.0219551.s122.pdf]

All real gene expression profiles are available from the GEO database on NCBI. The accession numbers associated with the gene expression profiles used in this study are as bellow:

|           |           |           |           |           |
|-----------|-----------|-----------|-----------|-----------|
| GSE26585  | GSE488    | GSE100642 | GSE10072  | GSE103184 |
| GSE103430 | GSE106635 | GSE106912 | GSE110398 | GSE12196  |
| GSE12452  | GSE13220  | GSE13597  | GSE13911  | GSE14304  |
| GSE16765  | GSE18608  | GSE20347  | GSE20466  | GSE20489  |
| GSE20586  | GSE21947  | GSE22356  | GSE22671  | GSE23400  |
| GSE24342  | GSE24988  | GSE25156  | GSE26623  | GSE2685   |
| GSE27114  | GSE29110  | GSE29633  | GSE3017   | GSE30502  |
| GSE31564  | GSE31738  | GSE32515  | GSE3268   | GSE33003  |
| GSE33373  | GSE33459  | GSE33463  | GSE33672  | GSE34400  |
| GSE34667  | GSE34872  | GSE3494   | GSE3519   | GSE35240  |
| GSE37404  | GSE37902  | GSE38531  | GSE38783  | GSE39549  |
| GSE41221  | GSE46727  | GSE46728  | GSE47406  | GSE48964  |
| GSE49382  | GSE49486  | GSE50604  | GSE5281   | GSE53122  |
| GSE54129  | GSE54216  | GSE54350  | GSE54917  | GSE55503  |
| GSE57002  | GSE5859   | GSE61140  | GSE62598  | GSE6414   |
| GSE64670  | GSE64718  | GSE65517  | GSE6720   | GSE67376  |
| GSE67492  | GSE67865  | GSE68918  | GSE7124   | GSE71868  |
| GSE7197   | GSE75037  | GSE7511   | GSE7567   | GSE7592   |
| GSE7670   | GSE7881   | GSE79973  | GSE83077  | GSE8498   |
| GSE9687   | GSE9820   | GSE98634  | GSE99295  | GSE48200  |
